# Supplementary material for: Antidepressant use during pregnancy and psychiatric disorders in offspring: Danish nationwide register based cohort study
Source: PubMed Central journal article supplement — BMJ. 2017 Sep 6;358:j3668. doi: 10.1136/bmj.j3668 (PMC5594425; doi:10.1136/bmj.j3668), 2017-09-06
Supplement: liux038670.ww1.pdf [file liux038670.ww1.pdf]

## Supplementary Online Content

**Supplementary table A.** Classes of antidepressant treatment during pregnancy (N=21,063)

| Antidepressants                                                                                                                                                                                                | ATC code                       | N of pregnancies | %    |
|----------------------------------------------------------------------------------------------------------------------------------------------------------------------------------------------------------------|--------------------------------|------------------|------|
| <b>SSRIs monotherapy</b>                                                                                                                                                                                       | N06AB                          | 16,154           | 1.8  |
| Citalopram                                                                                                                                                                                                     | N06AB04                        | 5,939            | 0.7  |
| Sertraline                                                                                                                                                                                                     | N06AB06                        | 3,383            | 0.4  |
| Fluoxetine                                                                                                                                                                                                     | N06AB03                        | 2,771            | 0.3  |
| Paroxetine                                                                                                                                                                                                     | N06AB05                        | 1,111            | 0.1  |
| Escitalopram                                                                                                                                                                                                   | N06AB10                        | 868              | 0.1  |
| Fluvoxamine                                                                                                                                                                                                    | N06AB08                        | 15               | <0.1 |
| More than one SSRI                                                                                                                                                                                             | -                              | 2,067            | 0.2  |
| <b>Non-SSRI antidepressant monotherapy</b> , including serotonin norepinephrine reuptake inhibitors, tricyclic antidepressants, and others (e.g. monoamine oxidase inhibitors and tetracyclic antidepressants) | N06AA, N06AF, N06AG, and N06AX | 3,295            | 0.4  |
| <b>Both SSRI and non-SSRI antidepressants</b>                                                                                                                                                                  | -                              | 1,614            | 0.2  |

Abbreviation: SSRI, selective serotonin reuptake inhibitor.

**Supplementary figure.** Hazard ratios of psychiatric disorders according to parental antidepressant use prior to and during pregnancy (N=905,083)

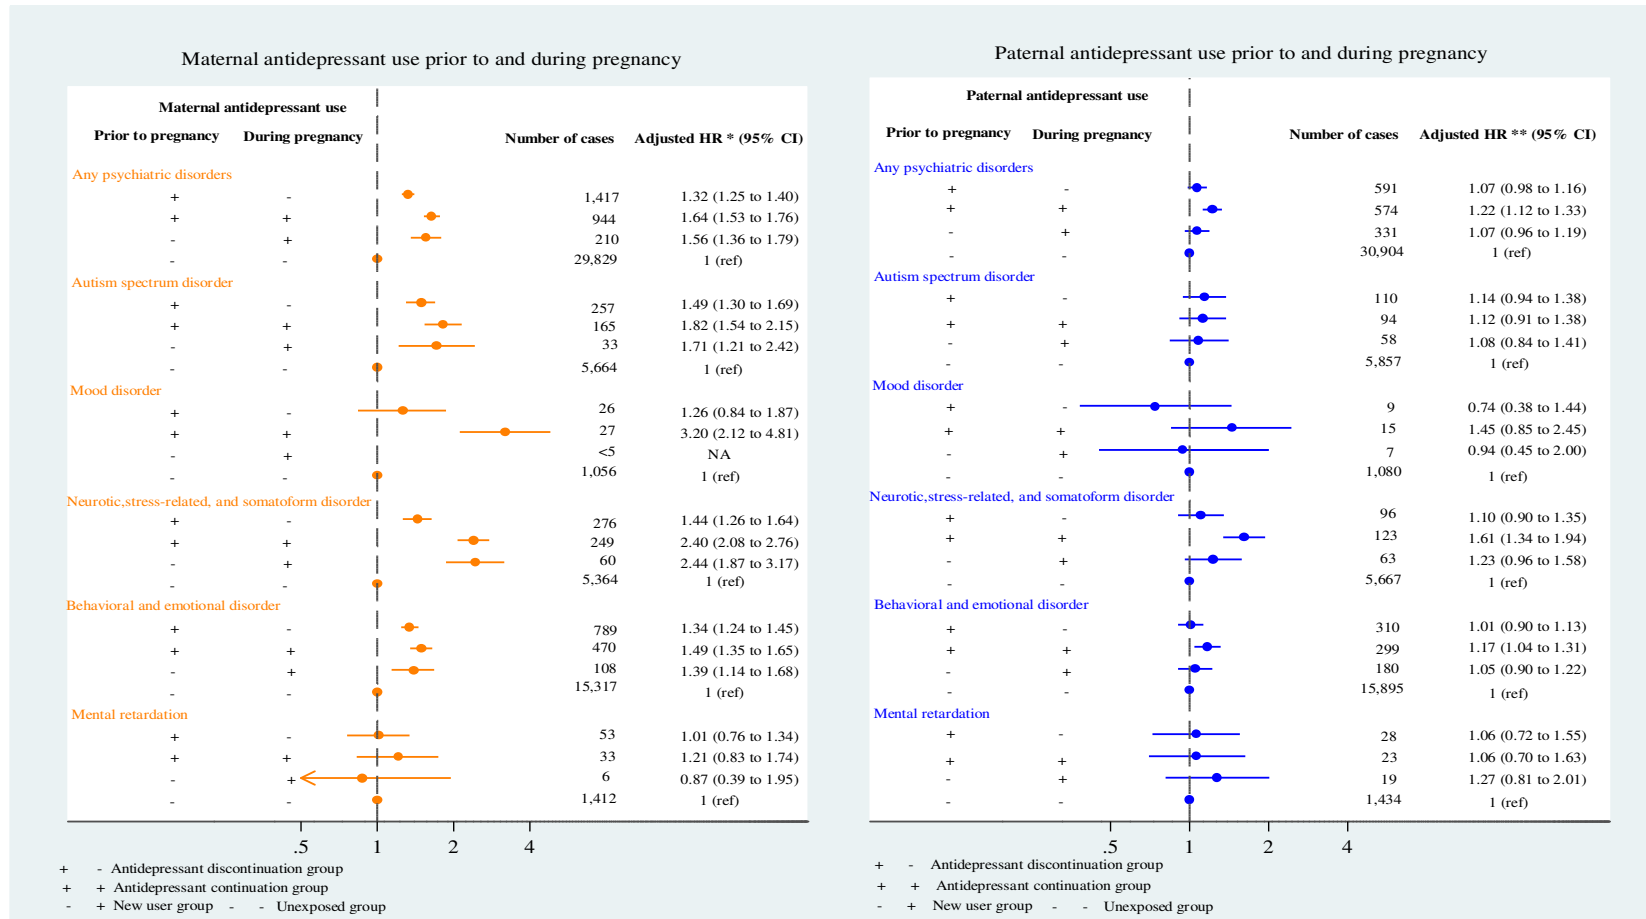

Abbreviations: HR, hazard ratio; CI, confidence interval; NA (not applicable) indicates that the number of cases is too small to estimate the adjusted hazard ratio.  
 \* Adjusted for maternal age at delivery, primiparity, maternal psychiatric history at delivery, in- and outpatient psychiatric treatment from 2 years before pregnancy until delivery, dispensation of other psychotropic prescriptions during pregnancy, dispensation of antiepileptic prescriptions during pregnancy, number of non-psychiatric hospital visits during pregnancy, smoking during pregnancy, place of residence, marital status, highest education, income, calendar year of delivery, and paternal psychiatric history at the time of delivery. \*\* Additional adjustment for maternal antidepressant use (unexposed, discontinuation,

continuation, or new user group), paternal age at delivery (continuous variable), and paternal in- or outpatient psychiatric treatment from 2 years prior to pregnancy to delivery (yes/ no).

**Supplementary table B.** Hazard ratios of specific psychiatric disorders among children born to mothers with continuous antidepressant use compared to mothers with discontinuous antidepressant use according to timing of antidepressants use (N=47,639)

| Timing of antidepressant use                                 | Cases | N      | Person-years        | Crude HR | Adjusted HR (95% CI) <sup>a</sup> |
|--------------------------------------------------------------|-------|--------|---------------------|----------|-----------------------------------|
| <b>Autism spectrum disorder</b>                              |       |        |                     |          |                                   |
| Antidepressant discontinuation group                         | 257   | 30,079 | 2.2×10 <sup>5</sup> | 1        | 1 (ref)                           |
| Antidepressant continuation group                            |       |        |                     |          |                                   |
| Use in the 1 <sup>st</sup> trimester only                    | 44    | 3,772  | 3.0×10 <sup>4</sup> | 1.18     | 1.21 (0.87 to 1.66)               |
| Use in the 2 <sup>nd</sup> or 3 <sup>rd</sup> trimester only | 5     | 575    | 3.8×10 <sup>3</sup> | 1.19     | 1.13 (0.46 to 2.74)               |
| Use in more than one trimester                               | 116   | 13,213 | 8.1×10 <sup>4</sup> | 1.40     | 1.25 (1.00 to 1.57)               |
| <b>Mood disorder</b>                                         |       |        |                     |          |                                   |
| Antidepressant discontinuation group                         | 26    | 30,079 | 2.2×10 <sup>5</sup> | 1        | 1 (ref)                           |
| Antidepressant continuation group                            |       |        |                     |          |                                   |
| Use in one trimester only <sup>b</sup>                       | 9     | 4,347  | 3.4×10 <sup>4</sup> | 1.96     | 2.06 (0.96 to 4.42)               |
| Use in more than one trimester                               | 18    | 13,213 | 8.1×10 <sup>4</sup> | 3.39     | 3.40 (1.82 to 6.35)               |
| <b>Neurotic, stress-related, and somatoform disorder</b>     |       |        |                     |          |                                   |
| Antidepressant discontinuation group                         | 276   | 30,079 | 2.2×10 <sup>5</sup> | 1        | 1 (ref)                           |
| Antidepressant continuation group                            |       |        |                     |          |                                   |
| Use in the 1 <sup>st</sup> trimester only                    | 53    | 3,772  | 3.0×10 <sup>4</sup> | 1.29     | 1.23 (0.92 to 1.66)               |
| Use in the 2 <sup>nd</sup> or 3 <sup>rd</sup> trimester only | 14    | 575    | 3.8×10 <sup>3</sup> | 3.41     | 2.46 (1.43 to 4.24)               |
| Use in more than one trimester                               | 182   | 13,213 | 8.1×10 <sup>4</sup> | 2.17     | 1.76 (1.45 to 2.14)               |
| <b>Behavioral and emotional disorder</b>                     |       |        |                     |          |                                   |
| Antidepressant discontinuation group                         | 789   | 30,079 | 2.2×10 <sup>5</sup> | 1        | 1 (ref)                           |
| Antidepressant continuation group                            |       |        |                     |          |                                   |
| Use in the 1 <sup>st</sup> trimester only                    | 132   | 3,772  | 3.0×10 <sup>4</sup> | 1.15     | 1.08 (0.89 to 1.30)               |
| Use in the 2 <sup>nd</sup> or 3 <sup>rd</sup> trimester only | 16    | 575    | 3.8×10 <sup>3</sup> | 1.25     | 1.10 (0.67 to 1.81)               |
| Use in more than one trimester                               | 322   | 13,213 | 8.1×10 <sup>4</sup> | 1.28     | 1.16 (1.01 to 1.33)               |
| <b>Mental retardation</b>                                    |       |        |                     |          |                                   |
| Antidepressant discontinuation group                         | 53    | 30,079 | 2.2×10 <sup>5</sup> | 1        | 1 (ref)                           |
| Antidepressant continuation group                            |       |        |                     |          |                                   |
| Use in one trimester only <sup>b</sup>                       | 13    | 4,347  | 3.4×10 <sup>4</sup> | 1.52     | 1.37 (0.74 to 2.51)               |
| Use in more than one trimester                               | 20    | 13,213 | 8.1×10 <sup>4</sup> | 1.12     | 1.12 (0.66 to 1.92)               |

Abbreviations: HR, hazard ratio; CI, confidence interval.

*Antidepressant discontinuation group*—Children whose mothers used antidepressants prior to pregnancy but not during pregnancy; *Antidepressant continuation group*—Children whose mothers used antidepressants both prior to pregnancy and during pregnancy.

<sup>a</sup> Adjusted for maternal age at delivery, primiparity, maternal psychiatric history at delivery, in- and outpatient psychiatric treatment from 2 years before pregnancy until delivery, dispensation of other psychotropic prescriptions during pregnancy, dispensation of antiepileptic prescriptions during pregnancy, number of non-psychiatric hospital visits during pregnancy, smoking during pregnancy, place of residence, marital status, highest education, income, calendar year of delivery, and paternal psychiatric history at the time of delivery. <sup>b</sup> Children whose mothers used antidepressant in 1<sup>st</sup>, 2<sup>nd</sup>, or 3<sup>rd</sup> trimester only.

**Supplementary table C.** Hazard ratios of specific psychiatric disorders among children born to mothers with continuous antidepressant use compared to mothers with discontinuous antidepressant use according to the class of antidepressants use (N=47,639)

| Class of antidepressant use                              | Cases | N      | Person-years        | Crude HR | Adjusted HR (95% CI) <sup>a</sup> |
|----------------------------------------------------------|-------|--------|---------------------|----------|-----------------------------------|
| <b>Autism spectrum disorder</b>                          |       |        |                     |          |                                   |
| Antidepressant discontinuation group                     | 257   | 30,079 | 2.2×10 <sup>5</sup> | 1        | 1 (ref)                           |
| Antidepressant continuation group                        |       |        |                     |          |                                   |
| SSRI monotherapy                                         | 125   | 13,501 | 9.0×10 <sup>4</sup> | 1.27     | 1.19 (0.96 to 1.48)               |
| Non-SSRI antidepressant monotherapy                      | 21    | 2,610  | 1.6×10 <sup>4</sup> | 1.24     | 1.18 (0.75 to 1.84)               |
| Use both SSRI and non-SSRI antidepressant                | 19    | 1,449  | 9.0×10 <sup>3</sup> | 2.01     | 1.86 (1.16 to 2.99)               |
| <b>Mood disorder</b>                                     |       |        |                     |          |                                   |
| Antidepressant discontinuation group                     | 26    | 30,079 | 2.2×10 <sup>5</sup> | 1        | 1 (ref)                           |
| Antidepressant continuation group                        |       |        |                     |          |                                   |
| SSRI monotherapy                                         | 21    | 13,501 | 9.0×10 <sup>4</sup> | 2.70     | 2.76 (1.53 to 4.96)               |
| Non-SSRI antidepressant monotherapy                      | <5    | 2,610  | 1.6×10 <sup>4</sup> | NA       | NA                                |
| Use both SSRI and non-SSRI antidepressant                | <5    | 1,449  | 9.0×10 <sup>3</sup> | NA       | NA                                |
| <b>Neurotic, stress-related, and somatoform disorder</b> |       |        |                     |          |                                   |
| Antidepressant discontinuation group                     | 276   | 30,079 | 2.2×10 <sup>5</sup> | 1        | 1 (ref)                           |
| Antidepressant continuation group                        |       |        |                     |          |                                   |
| SSRI monotherapy                                         | 177   | 13,501 | 9.0×10 <sup>4</sup> | 1.75     | 1.49 (1.22 to 1.80)               |
| Non-SSRI antidepressant monotherapy                      | 37    | 2,610  | 1.6×10 <sup>4</sup> | 1.94     | 1.80 (1.27 to 2.56)               |
| Use both SSRI and non-SSRI antidepressant                | 35    | 1,449  | 9.0×10 <sup>3</sup> | 3.70     | 2.76 (1.92 to 3.95)               |
| <b>Behavioral and emotional disorder</b>                 |       |        |                     |          |                                   |
| Antidepressant discontinuation group                     | 789   | 30,079 | 2.2×10 <sup>5</sup> | 1        | 1 (ref)                           |
| Antidepressant continuation group                        |       |        |                     |          |                                   |
| SSRI monotherapy                                         | 372   | 13,501 | 9.0×10 <sup>4</sup> | 1.25     | 1.15 (1.02 to 1.31)               |
| Non-SSRI antidepressant monotherapy                      | 52    | 2,610  | 1.6×10 <sup>4</sup> | 1.00     | 0.90 (0.68 to 1.19)               |
| Use both SSRI and non-SSRI antidepressant                | 46    | 1,449  | 9.0×10 <sup>3</sup> | 1.61     | 1.33 (0.99 to 1.80)               |
| <b>Mental retardation</b>                                |       |        |                     |          |                                   |
| Antidepressant discontinuation group                     | 53    | 30,079 | 2.2×10 <sup>5</sup> | 1        | 1 (ref)                           |
| Antidepressant continuation group                        |       |        |                     |          |                                   |
| SSRI monotherapy                                         | 28    | 13,501 | 9.0×10 <sup>4</sup> | 1.35     | 1.32 (0.83 to 2.11)               |
| Non-SSRI antidepressant monotherapy                      | <5    | 2,610  | 1.6×10 <sup>4</sup> | NA       | NA                                |
| Use both SSRI and non-SSRI antidepressant                | <5    | 1,449  | 9.0×10 <sup>3</sup> | NA       | NA                                |

Abbreviations: HR, hazard ratio; CI, confidence interval; SSRI, selective serotonin-reuptake inhibitor; NA (not applicable) indicates that the number of cases is too small to estimate the adjusted hazard ratio.

*Antidepressant discontinuation group*—Children whose mothers used antidepressants prior to pregnancy but not during pregnancy; *Antidepressant continuation group*—Children whose mothers used antidepressants both prior to pregnancy and during pregnancy.

<sup>a</sup> Adjusted for maternal age at delivery, primiparity, maternal psychiatric history at delivery, in- and outpatient psychiatric treatment from 2 years before pregnancy until delivery, dispensation of other psychotropic prescriptions during pregnancy, dispensation of antiepileptic prescriptions during pregnancy, number of non-psychiatric hospital visits during pregnancy, smoking during pregnancy, place of residence, marital status, highest education, income, calendar year of delivery, and paternal psychiatric history at the time of delivery.

**Supplementary table D.** Hazard ratios of specific psychiatric disorders among children born to mothers with continuous antidepressant use compared to mothers with discontinuous antidepressant use according to duration of antidepressant use (N=47,639)

| Duration of antidepressant use                           | Cases | N      | Person-years        | Crude HR | Adjusted HR (95% CI) <sup>a</sup> |
|----------------------------------------------------------|-------|--------|---------------------|----------|-----------------------------------|
| <b>Autism spectrum disorder</b>                          |       |        |                     |          |                                   |
| Antidepressant discontinuation group                     | 257   | 30,079 | 2.2×10 <sup>5</sup> | 1        | 1 (ref)                           |
| Antidepressant continuation group                        |       |        |                     |          |                                   |
| Use of antidepressant for ≤90 days                       | 44    | 4,075  | 3.2×10 <sup>4</sup> | 1.10     | 1.13 (0.82 to 1.56)               |
| Use of antidepressant for 91–180 days                    | 26    | 3,504  | 2.3×10 <sup>4</sup> | 1.01     | 0.95 (0.63 to 1.43)               |
| Use of antidepressant for ≥181 days                      | 95    | 9,981  | 6.0×10 <sup>4</sup> | 1.62     | 1.42 (1.11 to 1.82)               |
| Use per 30-day increase                                  | -     | -      | -                   | 1.03     | 1.02 (1.01 to 1.04)               |
| <b>Mood disorder</b>                                     |       |        |                     |          |                                   |
| Antidepressant discontinuation group                     | 26    | 30,079 | 2.2×10 <sup>5</sup> | 1        | 1 (ref)                           |
| Antidepressant continuation group                        |       |        |                     |          |                                   |
| Use for ≤90 days                                         | 6     | 4,075  | 3.2×10 <sup>4</sup> | 1.37     | 1.43 (0.58 to 3.48)               |
| Use for 91–180 days                                      | 5     | 3,504  | 2.3×10 <sup>4</sup> | 2.29     | 2.30 (0.87 to 6.04)               |
| Use for ≥181 days                                        | 16    | 9,981  | 6.0×10 <sup>4</sup> | 4.85     | 5.11 (2.65 to 9.86)               |
| Use per 30-day increase                                  | -     | -      | -                   | 1.07     | 1.07 (1.03 to 1.11)               |
| <b>Neurotic, stress-related, and somatoform disorder</b> |       |        |                     |          |                                   |
| Antidepressant discontinuation group                     | 276   | 30,079 | 2.2×10 <sup>5</sup> | 1        | 1 (ref)                           |
| Antidepressant continuation group                        |       |        |                     |          |                                   |
| Use for ≤90 days                                         | 66    | 4,075  | 3.2×10 <sup>4</sup> | 1.54     | 1.45 (1.11 to 1.90)               |
| Use for 91–180 days                                      | 37    | 3,504  | 2.3×10 <sup>4</sup> | 1.36     | 1.12 (0.79 to 1.59)               |
| Use for ≥181 days                                        | 146   | 9,981  | 6.0×10 <sup>4</sup> | 2.47     | 1.98 (1.61 to 2.45)               |
| Use per 30-day increase                                  | -     | -      | -                   | 1.05     | 1.04 (1.03 to 1.05)               |
| <b>Behavioral and emotional disorder</b>                 |       |        |                     |          |                                   |
| Antidepressant discontinuation group                     | 789   | 30,079 | 2.2×10 <sup>5</sup> | 1        | 1 (ref)                           |
| Antidepressant continuation group                        |       |        |                     |          |                                   |
| Use for ≤90 days                                         | 134   | 4,075  | 3.2×10 <sup>4</sup> | 1.09     | 1.01 (0.84 to 1.22)               |
| Use for 91–180 days                                      | 89    | 3,504  | 2.3×10 <sup>4</sup> | 1.13     | 1.02 (0.82 to 1.28)               |
| Use for ≥181 days                                        | 247   | 9,981  | 6.0×10 <sup>4</sup> | 1.39     | 1.27 (1.10 to 1.48)               |
| Use per 30-day increase                                  | -     | -      | -                   | 1.02     | 1.01 (1.00 to 1.02)               |
| <b>Mental retardation</b>                                |       |        |                     |          |                                   |
| Antidepressant discontinuation group                     | 53    | 30,079 | 2.2×10 <sup>5</sup> | 1        | 1 (ref)                           |
| Antidepressant continuation group                        |       |        |                     |          |                                   |
| Use for ≤90 days                                         | 12    | 4,075  | 3.2×10 <sup>4</sup> | 1.47     | 1.30 (0.69 to 2.44)               |
| Use for 91–180 days                                      | 6     | 3,504  | 2.3×10 <sup>4</sup> | 1.11     | 1.06 (0.45 to 2.49)               |
| Use for ≥181 days                                        | 15    | 9,981  | 6.0×10 <sup>4</sup> | 1.17     | 1.21 (0.67 to 2.21)               |
| Use per 30-day increase                                  | -     | -      | -                   | 1.02     | 1.02 (0.99 to 1.06)               |

Abbreviations: HR, hazard ratio; CI, confidence interval. *Antidepressant discontinuation group*—Children whose mothers used antidepressants prior to pregnancy but not during pregnancy; *Antidepressant continuation group*—Children whose mothers used antidepressants both prior to pregnancy and during pregnancy.

<sup>a</sup> Adjusted for maternal age at delivery, primiparity, maternal psychiatric history at delivery, in- and outpatient psychiatric treatment from 2 years before pregnancy until delivery, dispensation of other psychotropic prescriptions during pregnancy, dispensation of antiepileptic prescriptions during pregnancy, number of non-psychiatric hospital visits during pregnancy, smoking during pregnancy, place of residence, marital status, highest education, income, calendar year of delivery, and paternal psychiatric history at the time of delivery.

**Supplementary table E.** Hazard ratios of psychiatric disorders among children born to mothers with continuous antidepressant use compared to mothers with discontinuous antidepressant use by defining antidepressant exposure during pregnancy based on two prescriptions (N=43,135)

| Antidepressant use                                       | Cases | N      | Person-years        | Crude HR | Adjusted HR (95% CI) <sup>a</sup> |
|----------------------------------------------------------|-------|--------|---------------------|----------|-----------------------------------|
| <b>Any psychiatric disorders</b>                         |       |        |                     |          |                                   |
| Antidepressant discontinuation group                     | 1,417 | 30,079 | 2.2×10 <sup>5</sup> | 1        | 1 (ref)                           |
| Antidepressant continuation group                        | 714   | 13,056 | 8.4×10 <sup>4</sup> | 1.49     | 1.33 (1.21 to 1.46)               |
| <b>Autism spectrum disorder</b>                          |       |        |                     |          |                                   |
| Antidepressant discontinuation group                     | 257   | 30,079 | 2.2×10 <sup>5</sup> | 1        | 1 (ref)                           |
| Antidepressant continuation group                        | 125   | 13,056 | 8.7×10 <sup>4</sup> | 1.39     | 1.28 (1.02 to 1.60)               |
| <b>Mood disorder</b>                                     |       |        |                     |          |                                   |
| Antidepressant discontinuation group                     | 26    | 30,079 | 2.2×10 <sup>5</sup> | 1        | 1 (ref)                           |
| Antidepressant continuation group                        | 19    | 13,056 | 8.7×10 <sup>4</sup> | 3.01     | 3.01 (1.63 to 5.56)               |
| <b>Neurotic, stress-related, and somatoform disorder</b> |       |        |                     |          |                                   |
| Antidepressant discontinuation group                     | 276   | 30,079 | 2.2×10 <sup>5</sup> | 1        | 1 (ref)                           |
| Antidepressant continuation group                        | 190   | 13,056 | 8.6×10 <sup>4</sup> | 2.10     | 1.68 (1.38 to 2.04)               |
| <b>Behavioral and emotional disorder</b>                 |       |        |                     |          |                                   |
| Antidepressant discontinuation group                     | 789   | 30,079 | 2.2×10 <sup>5</sup> | 1        | 1 (ref)                           |
| Antidepressant continuation group                        | 355   | 13,056 | 8.6×10 <sup>4</sup> | 1.32     | 1.19 (1.04 to 1.35)               |
| <b>Mental retardation</b>                                |       |        |                     |          |                                   |
| Antidepressant discontinuation group                     | 53    | 30,079 | 2.2×10 <sup>5</sup> | 1        | 1 (ref)                           |
| Antidepressant continuation group                        | 24    | 13,056 | 8.7×10 <sup>4</sup> | 1.25     | 1.24 (0.75 to 2.05)               |

Abbreviations: HR, hazard ratio; CI, confidence interval.

*Antidepressant discontinuation group*—Children whose mothers used antidepressants prior to pregnancy but did not use during pregnancy; *Antidepressant continuation group*—Children whose mothers used antidepressants both prior to pregnancy and filled at least two prescriptions for antidepressants during pregnancy.

<sup>a</sup> Adjusted for maternal age at delivery, primiparity, maternal psychiatric history at delivery, in- and outpatient psychiatric treatment from 2 years before pregnancy until delivery, dispensation of other psychotropic prescriptions during pregnancy, dispensation of antiepileptic prescriptions during pregnancy, number of non-psychiatric hospital visits during pregnancy, smoking during pregnancy, place of residence, marital status, highest education, income, calendar year of delivery, and paternal psychiatric history at the time of delivery.

**Supplementary table F.** Hazard ratios of psychiatric disorders among children born to mothers with continuous antidepressant use compared to mothers who discontinued antidepressant use 3 months prior to pregnancy (N=43,274)

| Antidepressant use                                       | Cases | N      | Person-years        | Crude HR | Adjusted HR (95% CI) <sup>a</sup> |
|----------------------------------------------------------|-------|--------|---------------------|----------|-----------------------------------|
| <b>Any psychiatric disorders</b>                         |       |        |                     |          |                                   |
| Antidepressant discontinuation group                     | 1,200 | 25,714 | 1.9×10 <sup>5</sup> | 1        | 1 (ref)                           |
| Antidepressant continuation group                        | 944   | 17,560 | 1.2×10 <sup>5</sup> | 1.40     | 1.27 (1.17 to 1.39)               |
| <b>Autism spectrum disorder</b>                          |       |        |                     |          |                                   |
| Antidepressant discontinuation group                     | 224   | 25,714 | 1.9×10 <sup>5</sup> | 1        | 1 (ref)                           |
| Antidepressant continuation group                        | 165   | 17,560 | 1.2×10 <sup>5</sup> | 1.29     | 1.22 (0.99 to 1.50)               |
| <b>Mood disorder</b>                                     |       |        |                     |          |                                   |
| Antidepressant discontinuation group                     | 24    | 25,714 | 1.9×10 <sup>5</sup> | 1        | 1 (ref)                           |
| Antidepressant continuation group                        | 27    | 17,560 | 1.2×10 <sup>5</sup> | 2.50     | 2.51 (1.43 to 4.42)               |
| <b>Neurotic, stress-related, and somatoform disorder</b> |       |        |                     |          |                                   |
| Antidepressant discontinuation group                     | 224   | 25,714 | 1.9×10 <sup>5</sup> | 1        | 1 (ref)                           |
| Antidepressant continuation group                        | 249   | 17,560 | 1.2×10 <sup>5</sup> | 2.01     | 1.67 (1.38 to 2.01)               |
| <b>Behavioral and emotional disorder</b>                 |       |        |                     |          |                                   |
| Antidepressant discontinuation group                     | 684   | 25,714 | 1.9×10 <sup>5</sup> | 1        | 1 (ref)                           |
| Antidepressant continuation group                        | 470   | 17,560 | 1.2×10 <sup>5</sup> | 1.21     | 1.11 (0.98 to 1.25)               |
| <b>Mental retardation</b>                                |       |        |                     |          |                                   |
| Antidepressant discontinuation group                     | 46    | 25,714 | 1.9×10 <sup>5</sup> | 1        | 1 (ref)                           |
| Antidepressant continuation group                        | 33    | 17,560 | 1.2×10 <sup>5</sup> | 1.23     | 1.15 (0.73 to 1.83)               |

Abbreviations: HR, hazard ratio; CI, confidence interval.

*Antidepressant discontinuation group*—Children whose mothers used antidepressants from 2 years to 3 months prior to pregnancy but no use from 3 months prior to pregnancy until delivery; *Antidepressant continuation group*—Children whose mothers used antidepressants both within 2 years prior to pregnancy and during pregnancy.

<sup>a</sup> Adjusted for maternal age at delivery, primiparity, maternal psychiatric history at delivery, in- and outpatient psychiatric treatment from 2 years before pregnancy until delivery, dispensation of other psychotropic prescriptions during pregnancy, dispensation of antiepileptic prescriptions during pregnancy, number of non-psychiatric hospital visits during pregnancy, smoking during pregnancy, place of residence, marital status, highest education, income, calendar year of delivery, and paternal psychiatric history at the time of delivery.



**Supplementary table G.** Hazard ratios of psychiatric disorders among children born to mothers with continuous antidepressant use compared to mothers with discontinuous antidepressant use by excluding pregnancies with inpatient psychiatric treatments from 2 years before pregnancy until the delivery (N=44,995)

| Antidepressant use                                       | Cases | N      | Person-years        | Crude HR | Adjusted HR (95% CI) <sup>a</sup> |
|----------------------------------------------------------|-------|--------|---------------------|----------|-----------------------------------|
| <b>Any psychiatric disorders</b>                         |       |        |                     |          |                                   |
| Antidepressant discontinuation group                     | 1,299 | 28,783 | 2.1×10 <sup>5</sup> | 1        | 1 (ref)                           |
| Antidepressant continuation group                        | 810   | 16,212 | 1.1×10 <sup>5</sup> | 1.37     | 1.26 (1.15 to 1.38)               |
| <b>Autism spectrum disorder</b>                          |       |        |                     |          |                                   |
| Antidepressant discontinuation group                     | 238   | 28,783 | 2.1×10 <sup>5</sup> | 1        | 1 (ref)                           |
| Antidepressant continuation group                        | 154   | 16,212 | 1.1×10 <sup>5</sup> | 1.39     | 1.28 (1.04 to 1.58)               |
| <b>Mood disorder</b>                                     |       |        |                     |          |                                   |
| Antidepressant discontinuation group                     | 24    | 28,783 | 2.1×10 <sup>5</sup> | 1        | 1 (ref)                           |
| Antidepressant continuation group                        | 23    | 16,212 | 1.1×10 <sup>5</sup> | 2.63     | 2.74 (1.53 to 4.91)               |
| <b>Neurotic, stress-related, and somatoform disorder</b> |       |        |                     |          |                                   |
| Antidepressant discontinuation group                     | 246   | 28,783 | 2.1×10 <sup>5</sup> | 1        | 1 (ref)                           |
| Antidepressant continuation group                        | 210   | 16,212 | 1.1×10 <sup>5</sup> | 1.91     | 1.62 (1.34 to 1.95)               |
| <b>Behavioral and emotional disorder</b>                 |       |        |                     |          |                                   |
| Antidepressant discontinuation group                     | 714   | 28,783 | 2.1×10 <sup>5</sup> | 1        | 1 (ref)                           |
| Antidepressant continuation group                        | 399   | 16,212 | 1.1×10 <sup>5</sup> | 1.22     | 1.14 (1.00 to 1.29)               |
| <b>Mental retardation</b>                                |       |        |                     |          |                                   |
| Antidepressant discontinuation group                     | 50    | 28,783 | 2.1×10 <sup>5</sup> | 1        | 1 (ref)                           |
| Antidepressant continuation group                        | 30    | 16,212 | 1.1×10 <sup>5</sup> | 1.26     | 1.21 (0.76 to 1.92)               |

Abbreviations: HR, hazard ratio; CI, confidence interval.

*Antidepressant discontinuation group*—Children whose mothers used antidepressants prior to pregnancy but did not use during pregnancy; *Antidepressant continuation group*—Children whose mothers used antidepressants both prior to pregnancy and during pregnancy.

<sup>a</sup> Adjusted for maternal age at delivery, primiparity, maternal psychiatric history at delivery, in- and outpatient psychiatric treatment from 2 years before pregnancy until delivery, dispensation of other psychotropic prescriptions during pregnancy, dispensation of antiepileptic prescriptions during pregnancy, number of non-psychiatric hospital visits during pregnancy, smoking during pregnancy, place of residence, marital status, highest education, income, calendar year of delivery, and paternal psychiatric history at the time of delivery.

**Supplementary table H.** Hazard ratios of psychiatric disorders among children born to mothers with continuous antidepressant use compared to mothers with discontinuous antidepressant use stratified by maternal psychiatric history (N=47,639)

| Antidepressant use                                       | No maternal psychiatric history |        |                                   | With maternal psychiatric history |       |                                   | P-value for the interaction of psychiatric history and exposure group |
|----------------------------------------------------------|---------------------------------|--------|-----------------------------------|-----------------------------------|-------|-----------------------------------|-----------------------------------------------------------------------|
|                                                          | Cases                           | N      | Adjusted HR (95% CI) <sup>a</sup> | Cases                             | N     | Adjusted HR (95% CI) <sup>a</sup> |                                                                       |
| <b>Any psychiatric disorders</b>                         |                                 |        |                                   |                                   |       |                                   |                                                                       |
| Discontinuation group                                    | 853                             | 20,639 | 1 (ref)                           | 564                               | 9,440 | 1 (ref)                           | 0.054                                                                 |
| Continuation group                                       | 367                             | 9,066  | 1.19 (1.05 to 1.34)               | 577                               | 8,494 | 1.34 (1.19 to 1.51)               |                                                                       |
| <b>Autism spectrum disorder</b>                          |                                 |        |                                   |                                   |       |                                   |                                                                       |
| Discontinuation group                                    | 172                             | 20,639 | 1 (ref)                           | 85                                | 9,440 | 1 (ref)                           | 0.596                                                                 |
| Continuation group                                       | 77                              | 9,066  | 1.16 (0.88 to 1.52)               | 88                                | 8,494 | 1.33 (0.98 to 1.81)               |                                                                       |
| <b>Mood disorder</b>                                     |                                 |        |                                   |                                   |       |                                   |                                                                       |
| Discontinuation group                                    | 20                              | 20,639 | 1 (ref)                           | 6                                 | 9,440 | 1 (ref)                           | 0.059                                                                 |
| Continuation group                                       | 10                              | 9,066  | 1.76 (0.82 to 3.78)               | 17                                | 8,494 | 5.20 (2.01 to 13.45)              |                                                                       |
| <b>Neurotic, stress-related, and somatoform disorder</b> |                                 |        |                                   |                                   |       |                                   |                                                                       |
| Discontinuation group                                    | 142                             | 20,639 | 1 (ref)                           | 134                               | 9,440 | 1 (ref)                           | 0.103                                                                 |
| Continuation group                                       | 70                              | 9,066  | 1.47 (1.10 to 1.96)               | 179                               | 8,494 | 1.65 (1.31 to 2.08)               |                                                                       |
| <b>Behavioral and emotional disorder</b>                 |                                 |        |                                   |                                   |       |                                   |                                                                       |
| Discontinuation group                                    | 449                             | 20,639 | 1 (ref)                           | 340                               | 9,440 | 1 (ref)                           | 0.655                                                                 |
| Continuation group                                       | 191                             | 9,066  | 1.19 (1.01 to 1.41)               | 279                               | 8,494 | 1.08 (0.91 to 1.27)               |                                                                       |
| <b>Mental retardation</b>                                |                                 |        |                                   |                                   |       |                                   |                                                                       |
| Discontinuation group                                    | 35                              | 20,639 | 1 (ref)                           | 18                                | 9,440 | 1 (ref)                           | 0.381                                                                 |
| Continuation group                                       | 13                              | 9,066  | 1.02 (0.54 to 1.95)               | 20                                | 8,494 | 1.40 (0.73 to 2.67)               |                                                                       |

Abbreviations: HR, hazard ratio; CI, confidence interval.

*Antidepressant discontinuation group*—Children whose mothers used antidepressants prior to pregnancy but did not use during pregnancy; *Antidepressant continuation group*—Children whose mothers used antidepressants both prior to pregnancy and during pregnancy.

<sup>a</sup> Adjusted for maternal age at delivery, primiparity, in- and outpatient psychiatric treatment from 2 years before pregnancy until delivery, dispensation of other psychotropic prescriptions during pregnancy, dispensation of antiepileptic prescriptions during pregnancy, number of non-psychiatric hospital visits during pregnancy, smoking during pregnancy, place of residence, marital status, highest education, income, calendar year of delivery, and paternal psychiatric history at the time of delivery.
